# Supplementary material for: Oral Glutamine Supplementation Reduces Obesity, Pro-Inflammatory Markers, and Improves Insulin Sensitivity in DIO Wistar Rats and Reduces Waist Circumference in Overweight and Obese Humans
Source: MDPI journal article supplement (doi:10.3390/nu11030536), 2019-03-01
Supplement: s1 [file s1]

Supplemental Data

**Table S1.** Metabolic characteristics of overweight volunteers before and after supplementation with glutamine or alanine.

|                                  | Overweight Volunteers |                |                 |                    |                |                 |
|----------------------------------|-----------------------|----------------|-----------------|--------------------|----------------|-----------------|
|                                  | Ala Suppl (n = 8)     |                | <i>p</i> -Value | Gln Suppl (n = 11) |                | <i>p</i> -Value |
|                                  | Before                | After          |                 | Before             | After          |                 |
| Height (m)                       | 1.63 ± 0.05           | 1.63 ± 0.05    |                 | 1.62 ± 0.08        | 1.62 ± 0.08    |                 |
| Weight (kg)                      | 73.15 ± 6.51          | 73.55 ± 6.30   | 0.17            | 73.8 ± 8.65        | 73.34 ± 8.89   | 0.13            |
| BMI (kg/m <sup>2</sup> )         | 27.6 ± 1.80           | 27.75 ± 1.76   | 0.16            | 28.2 ± 1.09        | 28.00 ± 1.15   | 0.10            |
| Serum amino acid levels (μmol/L) | 448.09 ± 52.30        | 554.46 ± 57.64 | 0.0001          | 419.88 ± 35.11     | 531.09 ± 36.52 | 0.0001          |
| WC (cm)                          | 85.5 ± 4.84           | 85.3 ± 4.51    | 0.52            | 87 ± 5.71          | 85.18 ± 5.66   | 0.001 *         |
| Glucose (mmol/L)                 | 4.73 ± 0.37           | 4.65 ± 0.40    | 0.34            | 4.86 ± 0.58        | 4.92 ± 0.42    | 0.83            |
| Insulin (μU/mL)                  | 2.78 ± 1.74           | 3.35 ± 1.35    | 0.33            | 5.53 ± 0.98        | 4.97 ± 1.96    | 0.41            |
| TNF-α (pg/mL)                    | 3.46 ± 1.92           | 3.50 ± 1.75    | 0.91            | 6.37 ± 4.22        | 3.56 ± 1.25    | 0.28            |
| IL-1β (pg/mL)                    | 2.80 ± 0.80           | 2.81 ± 0.70    | 0.84            | 3.85 ± 0.33        | 3.71 ± 0.20    | 0.31            |
| IL-6 (pg/mL)                     | 1.80 ± 0.67           | 1.79 ± 0.62    | 0.96            | 1.33 ± 0.47        | 1.60 ± 1.15    | 0.53            |
| LPS (EU/mL)                      | 0.59 ± 0.07           | 0.59 ± 0.07    | >0.99           | 0.51 ± 0.08        | 0.47 ± 0.05    | 0.04 *          |

Gln suppl, L-glutamine supplementation; Ala suppl, alanine supplementation; BMI, body mass index; WC, waist circumference; TNF-α, tumor necrosis alpha; IL-1β, interleukin-1 beta; IL6, interleukin 6; LPS, lipopolysaccharide. Data were collected before and after 14 days of supplementation with either Ala or Gln. Serum parameters were obtained from overnight fasted volunteers. Data were expressed as mean ± SD. *p*-value indicates the difference between before and after glutamine or alanine supplementation obtained by paired Student's *t* test under normality and Wilcoxon Mann-Whitney test otherwise. \* *p* indicates a significant difference between before the same amino acid supplementation.

**Table S2.** Metabolic characteristics of obese volunteers before and after supplementation with glutamine or alanine.

|                          | Obese Volunteers  |               |                 |                    |               |                 |
|--------------------------|-------------------|---------------|-----------------|--------------------|---------------|-----------------|
|                          | Ala Suppl (n = 7) |               | <i>p</i> -value | Gln Suppl (n = 13) |               | <i>p</i> -value |
|                          | Before            | After         |                 | Before             | After         |                 |
| Height (m)               | 1.61 ± 0.086      | 1.61 ± 0.086  |                 | 1.58 ± 0.06        | 1.58 ± 0.06   |                 |
| Weight (kg)              | 86.6 ± 12.69      | 86.93 ± 12.45 | 0.46            | 86.19 ± 13.89      | 85.98 ± 13.82 | 0.34            |
| BMI (kg/m <sup>2</sup> ) | 33.07 ± 2.97      | 33.19 ± 2.91  | 0.44            | 34.51 ± 5.10       | 34.42 ± 5.08  | 0.37            |

|                                               |                     |                     |        |                    |                    |         |
|-----------------------------------------------|---------------------|---------------------|--------|--------------------|--------------------|---------|
| Serum amino acid levels ( $\mu\text{mol/L}$ ) | 502.89 $\pm$ 124.56 | 613.87 $\pm$ 119.43 | 0.0001 | 415.53 $\pm$ 19.09 | 521.52 $\pm$ 25.98 | 0.0001  |
| WC (cm)                                       | 95.1 $\pm$ 5.57     | 95.14 $\pm$ 5.86    | >0.99  | 96.07 $\pm$ 9.61   | 93.46 $\pm$ 9.06   | 0.002 * |
| Glucose (mmol/L)                              | 4.82 $\pm$ 0.47     | 5.07 $\pm$ 0.65     | 0.06   | 4.76 $\pm$ 0.47    | 4.78 $\pm$ 0.55    | 0.84    |
| Insulin ( $\mu\text{U/mL}$ )                  | 5.01 $\pm$ 3.03     | 5.40 $\pm$ 3.26     | 0.27   | 5.56 $\pm$ 4.27    | 4.41 $\pm$ 3.78    | 0.037*  |
| TNF- $\alpha$ (pg/mL)                         | 3.08 $\pm$ 1.39     | 3.18 $\pm$ 1.16     | 0.67   | 5.91 $\pm$ 3.54    | 3.04 $\pm$ 1.25    | 0.09    |
| IL-1 $\beta$ (pg/mL)                          | 3.03 $\pm$ 0.77     | 3.09 $\pm$ 0.76     | 0.74   | 3.42 $\pm$ 0.79    | 3.18 $\pm$ 0.71    | 0.41    |
| IL-6 (pg/mL)                                  | 3.12 $\pm$ 3.998    | 3.20 $\pm$ 3.92     | 0.37   | 2.30 $\pm$ 1.07    | 2.01 $\pm$ 0.80    | 0.22    |
| LPS (EU/mL)                                   | 0.58 $\pm$ 0.05     | 0.58 $\pm$ 0.06     | 0.78   | 0.56 $\pm$ 0.13    | 0.47 $\pm$ 0.06    | 0.08    |

Gln suppl, L-glutamine supplementation; Ala suppl, alanine supplementation; BMI, body mass index; WC, waist circumference; TNF- $\alpha$ , tumor necrosis alpha; IL-1 $\beta$ , interleukin-1 beta; IL6, interleukin 6; LPS, lipopolysaccharide. Data were collected before and after 14 days of supplementation with either Ala or Gln. Serum parameters were obtained from overnight fasted volunteers. Data were expressed as mean  $\pm$  SD. *p*-value indicates the difference between before and after glutamine or alanine supplementation obtained by paired Student's *t* test under normality and Wilcoxon Mann-Whitney test otherwise. \* *p* indicates a significant difference between before the same amino acid supplementation.
